# Supplementary material for: Second ionization constant of sulfuric acid in H2O and D2O from 150 to 300 °C at p = 11.5 MPa using flow AC conductivity
Source: Royal Society of Chemistry journal article supplement (doi:10.1039/d2cp01761j), 2022-12-21
Supplement: d2cp01761j1.pdf [file d2cp01761j1.pdf]

## **Electronic Supplementary Information:**

# Second Ionization Constant of Sulfuric Acid in H<sub>2</sub>O and D<sub>2</sub>O from 150 to 300 °C at $p = 11.5$ MPa Using Flow AC Conductivity

Jacy K. Conrad<sup>1\*</sup>, Hugues Arcis<sup>1</sup>, Jane P. Ferguson<sup>1</sup>, and Peter R. Tremaine<sup>1\*</sup>

<sup>1</sup> Department of Chemistry, University of Guelph, Guelph, ON, Canada, N1G 2W1

\* Corresponding authors: [tremaine@uoguelph.ca](mailto:tremaine@uoguelph.ca) and [jacy.conrad@inl.gov](mailto:jacy.conrad@inl.gov)

Table S1. Details of chemicals and solutions used in this work

| Chemical                       | Brand           | Product number | Lot number | Solvent          | Stock solution concentration /mol·kg <sup>-1</sup> | Working solution concentration /mmol·kg <sup>-1</sup> |
|--------------------------------|-----------------|----------------|------------|------------------|----------------------------------------------------|-------------------------------------------------------|
| K <sub>2</sub> SO <sub>4</sub> | Sigma-Aldrich   | 221325         | MKBW3546V  | H <sub>2</sub> O | 0.398593 ± 0.000001                                | 9.9613 ± 0.0001                                       |
|                                |                 |                |            | D <sub>2</sub> O | 0.317773 ± 0.000001                                | 9.5331 ± 0.0001                                       |
| KHSO <sub>4</sub>              | Aldrich         | 401544         | MKCG9783   | H <sub>2</sub> O | 0.026261 ± 0.000001                                | 0.031879 ± 0.000002                                   |
|                                |                 |                |            | D <sub>2</sub> O | 0.033511 ± 0.000002                                | 0.036741 ± 0.000002                                   |
| KOH                            | Fisher Chemical | SP236          | 135219     | H <sub>2</sub> O | 0.209391 ± 0.000022                                | 0.199747 ± 0.000031<br>0.217558 ± 0.000031            |
| KOD                            | Sigma-Aldrich   | 176761         | MKCC3238   | D <sub>2</sub> O | 0.170443 ± 0.000088                                | 0.153859 ± 0.000081<br>0.149313 ± 0.000079            |
| H <sub>2</sub> SO <sub>4</sub> | Sigma-Aldrich   | 339741         | SHBK1251   | H <sub>2</sub> O | 0.41511 ± 0.00013                                  | 11.3257 ± 0.0036                                      |
|                                |                 |                |            | D <sub>2</sub> O | 0.370934 ± 0.000071                                | 10.5123 ± 0.0020                                      |
| HCl                            | Sigma-Aldrich   | 339253         | SHBJ3824   | H <sub>2</sub> O | 0.129939 ± 0.000097                                | 0.26620 ± 0.00020                                     |
| DCl                            | Aldrich         | 543047         | MKCG2538   | D <sub>2</sub> O | 0.092108 ± 0.000064                                | 0.23893 ± 0.00017                                     |
| KCl                            | Alfa Aesar      | 87626          | L10Y036    | H <sub>2</sub> O | 0.087129                                           | 0.268575                                              |
| KCl                            | Alfa Aesar      | 87626          | Z05D036    | D <sub>2</sub> O | 0.145321                                           | 0.296134 ± 0.000011                                   |
| NaCl                           | Alfa Aesar      | 87605          | A18Z044    | H <sub>2</sub> O | 0.10093                                            | 0.167566                                              |
| KHP                            | Sigma-Aldrich   | P1088          | MKCG4802   |                  |                                                    |                                                       |
| phenolphthalein                | Sigma-Aldrich   | 319236         | MKCG7813V  |                  |                                                    |                                                       |
| CH <sub>3</sub> COOD           | Aldrich         | 151777         | MKCF5554   | D <sub>2</sub> O |                                                    |                                                       |

Table S2a. Calculated molal concentrations of the aqueous species generated from a 0.009961 mol·kg<sup>-1</sup> solution of K<sub>2</sub>SO<sub>4</sub> in H<sub>2</sub>O at  $p = 11.5$  MPa.

| $T$   | $m_{\text{SO}_4^{2-}}$               | $m_{\text{HSO}_4^-}$ | $m_{\text{KSO}_4^-}$ | $m_{\text{K}^+}$ | $m_{\text{K}_2\text{SO}_4}$ | $m_{\text{OH}^-}$ | $m_{\text{H}^+}$ |
|-------|--------------------------------------|----------------------|----------------------|------------------|-----------------------------|-------------------|------------------|
| °C    | 10 <sup>6</sup> mol·kg <sup>-1</sup> |                      |                      |                  |                             |                   |                  |
| 150.2 | 8653.47                              | 10.95                | 1291.79              | 18620.6          | 5.09                        | 11.33             | 0.38             |
| 200.1 | 7915.67                              | 40.69                | 1979.47              | 17892.2          | 25.47                       | 40.93             | 0.24             |
| 225.1 | 7352.48                              | 66.28                | 2486.93              | 17324.5          | 55.60                       | 66.47             | 0.19             |
| 250.1 | 6598.91                              | 104.60               | 3137.17              | 16544.2          | 120.61                      | 104.74            | 0.13             |
| 275.1 | 5595.97                              | 169.47               | 3934.49              | 15465.4          | 261.36                      | 169.55            | 0.08             |
| 300.3 | 4347.35                              | 143.58               | 4890.00              | 13871.9          | 580.37                      | 143.65            | 0.07             |

Table S2b. Calculated molal concentrations of the aqueous species generated from a 0.009533 mol·kg<sup>-1</sup> solution of K<sub>2</sub>SO<sub>4</sub> in D<sub>2</sub>O at  $p = 11.5$  MPa.

| $T$   | $m_{\text{SO}_4^{2-}}$               | $m_{\text{DSO}_4^-}$ | $m_{\text{KSO}_4^-}$ | $m_{\text{K}^+}$ | $m_{\text{K}_2\text{SO}_4}$ | $m_{\text{OD}^-}$ | $m_{\text{D}^+}$ |
|-------|--------------------------------------|----------------------|----------------------|------------------|-----------------------------|-------------------|------------------|
| °C    | 10 <sup>6</sup> mol·kg <sup>-1</sup> |                      |                      |                  |                             |                   |                  |
| 150.2 | 7735.57                              | 7.49                 | 1779.10              | 17265.2          | 10.86                       | 7.58              | 0.08             |
| 200.1 | 7043.14                              | 25.60                | 2421.12              | 16558.6          | 43.17                       | 25.67             | 0.06             |
| 225.1 | 6515.11                              | 49.98                | 2882.88              | 16013.1          | 85.05                       | 50.02             | 0.04             |
| 250.1 | 5821.03                              | 86.44                | 3457.80              | 15272.7          | 167.75                      | 86.46             | 0.03             |
| 275.1 | 4132.44                              | 156.08               | 4132.44              | 14268.7          | 332.44                      | 156.10            | 0.02             |
| 300.3 | 3789.84                              | 180.77               | 4886.32              | 12827.5          | 676.10                      | 180.78            | 0.01             |

Table S3a. Single Ion Limiting Molar Conductivities in H<sub>2</sub>O from Erickson<sup>1</sup>, Refit for This Work.

| $T$              | $p$   | $\lambda^\circ(\text{Cl}^-)$                   | $\lambda^\circ(\text{K}^+)$ | $\lambda^\circ(\text{H}_3\text{O}^+)$ | $\lambda^\circ(\text{OH}^-)$ |
|------------------|-------|------------------------------------------------|-----------------------------|---------------------------------------|------------------------------|
| $^\circ\text{C}$ | MPa   | $\text{S}\cdot\text{cm}^2\cdot\text{mol}^{-1}$ |                             |                                       |                              |
| 25.02            | 20.30 | 75.8                                           | 74.4                        | 349.0                                 | 196.7                        |
| 101.07           | 21.28 | 204.2                                          | 192.6                       | 661.1                                 | 437.6                        |
| 150.15           | 21.31 | 297.4                                          | 275.4                       | 787.7                                 | 520.3                        |
| 198.73           | 21.30 | 386.8                                          | 353.1                       | 815.8                                 | 649.3                        |
| 224.87           | 21.07 | 442.8                                          | 401.7                       | 834.0                                 | 730.8                        |
| 250.41           | 21.14 | 481.9                                          | 434.5                       | 859.9                                 | 776.0                        |
| 275.48           | 20.14 | 521.3                                          | 467.6                       | 851.0                                 | 781.4                        |
| 298.76           | 21.15 | 552.6                                          | 493.6                       | 886.0                                 | 841.3                        |

Table S3b. Single Ion Limiting Molar Conductivities in D<sub>2</sub>O from Erickson<sup>1</sup>, Refit for This Work.

| $T$              | $p$   | $\lambda^\circ(\text{Cl}^-)$                   | $\lambda^\circ(\text{K}^+)$ | $\lambda^\circ(\text{D}_3\text{O}^+)$ | $\lambda^\circ(\text{OD}^-)$ |
|------------------|-------|------------------------------------------------|-----------------------------|---------------------------------------|------------------------------|
| $^\circ\text{C}$ | MPa   | $\text{S}\cdot\text{cm}^2\cdot\text{mol}^{-1}$ |                             |                                       |                              |
| 25.02            | 20.30 | 62.2                                           | 61.0                        | 246.6                                 | 112.6                        |
| 101.07           | 21.28 | 177.3                                          | 167.3                       | 464.6                                 | 231.9                        |
| 150.15           | 21.31 | 258.3                                          | 239.3                       | 563.4                                 | 212.4                        |
| 198.73           | 21.30 | 336.6                                          | 307.4                       | 629.7                                 | 460.5                        |
| 224.87           | 21.07 | 380.9                                          | 345.5                       | 668.6                                 | 570.0                        |
| 250.41           | 21.14 | 420.4                                          | 379.1                       | 687.7                                 | 611.2                        |
| 275.48           | 20.14 | 462.5                                          | 415.0                       | 674.1                                 | 628.9                        |
| 298.76           | 21.15 | 502.7                                          | 449.1                       | 681.6                                 | 675.4                        |

Table S4. Quint-Viallard Conductivity Model Parameters ( $E$ ,  $S$ ,  $J_1$ , and  $J_2$ ) for the Conductivities of the Equivalent Electrolytes ( $\Lambda_1$ ,  $\Lambda_2$ ,  $\Lambda_3$ , and  $\Lambda_4$ ) under the Experimental Conditions in H<sub>2</sub>O and D<sub>2</sub>O.

| $T$<br>/°C  | $E$              |                  | $S$              |                  | $J_1$            |                  | $J_2$            |                  |
|-------------|------------------|------------------|------------------|------------------|------------------|------------------|------------------|------------------|
|             | H <sub>2</sub> O | D <sub>2</sub> O |
| $\Lambda_1$ |                  |                  |                  |                  |                  |                  |                  |                  |
| 150.2       | 78.8783          | 75.0388          | 477.099          | 419.025          | 1242.59          | 1119.51          | 1857.91          | 1677.07          |
| 200.1       | 175.731          | 166.435          | 708.693          | 633.929          | 2422.52          | 2220.50          | 4202.24          | 3864.33          |
| 225.1       | 258.699          | 245.229          | 845.556          | 763.467          | 3375.98          | 3123.53          | 6357.22          | 5909.25          |
| 250.1       | 383.219          | 363.978          | 1004.83          | 915.158          | 4772.77          | 4456.38          | 9842.18          | 9250.35          |
| 275.1       | 581.255          | 553.995          | 1200.04          | 1101.79          | 6964.25          | 6565.37          | 15943.5          | 15171.9          |
| 300.3       | 937.995          | 901.802          | 1465.25          | 1357.96          | 10898.3          | 10420.2          | 28419.4          | 27566.5          |
| $\Lambda_2$ |                  |                  |                  |                  |                  |                  |                  |                  |
| 150.2       | 851.585          | 647.567          | 1076.02          | 899.575          | 4660.27          | 3698.50          | 5113.55          | 4010.54          |
| 200.1       | 1481.32          | 1177.51          | 1549.81          | 1329.53          | 8636.31          | 7106.35          | 10621.3          | 8683.64          |
| 225.1       | 1973.11          | 1605.80          | 1827.63          | 1588.23          | 11844.1          | 9937.14          | 15591.3          | 13036.4          |
| 250.1       | 2680.45          | 2233.71          | 2150.97          | 1892.21          | 16575.0          | 14183.6          | 23588.3          | 20181.1          |
| 275.1       | 3772.80          | 3222.66          | 2549.07          | 2269.10          | 24092.6          | 21056.2          | 37598.1          | 32977.1          |
| 300.3       | 5704.79          | 5025.21          | 3095.26          | 2793.51          | 37861.9          | 34019.1          | 66444.4          | 60246.4          |
| $\Lambda_3$ |                  |                  |                  |                  |                  |                  |                  |                  |
| 150.2       | 283.876          | 266.053          | 871.149          | 763.239          | 2455.87          | 2215.98          | 2322.09          | 2125.98          |
| 200.1       | 683.578          | 639.572          | 1309.98          | 1169.73          | 5256.76          | 4823.80          | 5915.26          | 5488.08          |
| 225.1       | 1037.67          | 974.500          | 1573.84          | 1419.28          | 7692.42          | 7129.07          | 9470.39          | 8868.91          |
| 250.1       | 1582.20          | 1493.85          | 1885.30          | 1716.05          | 11451.2          | 10721.5          | 15513.9          | 14680.2          |
| 275.1       | 2471.65          | 2351.23          | 2273.49          | 2088.00          | 17677.6          | 16742.7          | 26641.4          | 25530.9          |
| 300.3       | 4125.87          | 3980.67          | 2812.08          | 2610.72          | 29551.9          | 28490.2          | 50675.5          | 49595.5          |
| $\Lambda_4$ |                  |                  |                  |                  |                  |                  |                  |                  |
| 150.2       | 282.767          | 210.856          | 623.213          | 515.939          | 2373.71          | 1874.15          | 3449.31          | 2741.73          |
| 200.1       | 461.828          | 357.062          | 879.826          | 747.219          | 4113.12          | 3349.41          | 6877.60          | 5658.50          |
| 225.1       | 593.923          | 468.246          | 1026.48          | 882.848          | 5425.81          | 4490.90          | 9831.41          | 8239.65          |
| 250.1       | 776.328          | 624.192          | 1193.85          | 1038.97          | 7267.40          | 6113.12          | 14415.3          | 12309.4          |
| 275.1       | 1045.99          | 858.318          | 1395.36          | 1227.95          | 10038.5          | 8586.81          | 22128.6          | 19227.9          |
| 300.3       | 1499.38          | 1261.70          | 1664.5           | 1483.22          | 14801.7          | 12936.7          | 37267.0          | 33350.4          |

In the 1997 paper by Bešter-Rogač *et al.*<sup>2</sup>, Eqn. A6b in the Appendix should read:

$$Q_3 = -\frac{(|z_1| + |z_2|)\lambda_j^\circ Q_4}{\lambda_1^\circ + \lambda_2^\circ} - \left( |z_j| + \frac{2z_j|z_j|(z_1 + z_2)}{q|z_1||z_2|} \right) Q_5 + |z_j| Q_6 \quad \text{* MERGEFORMAT (18)}$$

Even when the same value for the distance of closest approach is used, the Quint-Viallard conductivity model from this work produces a different value of the  $J_1$  term for the anion than was calculated by Bešter-Rogač *et al.*<sup>2</sup>. This comparison can be seen at 298.15 K in Table S6.

Table S5. A comparison of the Quint-Viallard equation coefficients  $E$ ,  $S$ ,  $J_1$ , and  $J_2$  at 298.15 K for the tartrate anion and the proton from this work and that of Bešter-Rogač *et al.*<sup>2</sup> with the distance of closest approach,  $a = 6.75 \text{ \AA}$ .

|                             | Bešter-Rogač <i>et al.</i> <sup>2</sup> | This work |
|-----------------------------|-----------------------------------------|-----------|
| $S(\text{H}^+)$             | 153.77                                  | 153.77    |
| $S(1/2 \text{ Tar}^{2-})$   | 81.92                                   | 81.96     |
| $E(\text{H}^+)$             | 227.42                                  | 227.42    |
| $E(1/2 \text{ Tar}^{2-})$   | -46.81                                  | -46.82    |
| $J_1(\text{H}^+)$           | 1426.80                                 | 1426.76   |
| $J_1(1/2 \text{ Tar}^{2-})$ | 279.07                                  | 17.27     |

In the 1999 paper by Tsurko *et al.*<sup>3</sup>, Eqn. 43 in the Appendix should read:

$$Q_1 = \frac{z_1^2 z_2^2 b^2 4(3 - 2q + 3\sqrt{q}) + |z_1||z_2|b(24 + 13q + 21\sqrt{q}) + 4(3 + 5q + 6\sqrt{q})}{12(1 + \sqrt{q})b^3} \quad \backslash * \text{MERGEFORMAT (19)}$$

Even when the same value for the distance of closest approach is used, the Quint-Viallard conductivity model from this work produces a different value of the  $J_1$  term than was calculated by Tsurko *et al.*<sup>3</sup>. This comparison can be seen at 298.15 K in Table S7.

Table S6. A comparison of the Quint-Viallard equation coefficients  $E$ ,  $S$ ,  $J_1$ , and  $J_2$  at 298.15 K for the tartrate anion and the proton from this work and that of Tsurko *et al.*<sup>3</sup> with the distance of closest approach,  $a = 4.0 \text{ \AA}$ .

|          | Na <sup>+</sup> + OH <sup>-</sup> |           | Na <sup>+</sup> + HPO <sub>4</sub> <sup>2-</sup> |           | Na <sup>+</sup> + H <sub>2</sub> PO <sub>4</sub> <sup>-</sup> |           |
|----------|-----------------------------------|-----------|--------------------------------------------------|-----------|---------------------------------------------------------------|-----------|
|          | Tsurko <i>et al.</i>              | This work | Tsurko <i>et al.</i>                             | This work | Tsurko <i>et al.</i>                                          | This work |
| $S_1$    | 41.83                             | 41.83     | 51.66                                            | 51.66     | 41.83                                                         | 41.83     |
| $S_2$    | 75.87                             | 75.87     | 84.97                                            | 84.97     | 37.66                                                         | 37.66     |
| $E_1$    | 5.3153                            | 5.3151    | 40.44                                            | 40.44     | 1.6722                                                        | 1.6720    |
| $E_2$    | 34.19                             | 34.19     | -52.50                                           | -52.50    | -0.5463                                                       | -0.5465   |
| $J_{11}$ | 83.58                             | 84.55     | 197.23                                           | 198.49    | 71.46                                                         | 72.43     |
| $J_{12}$ | 267.26                            | 254.96    | 191.15                                           | -40.16    | 62.80                                                         | 55.94     |
| $J_{21}$ | 108.17                            | 108.16    | 255.12                                           | 255.10    | 90.58                                                         | 90.58     |
| $J_{22}$ | 319.88                            | 319.86    | -165.00                                          | -165.00   | 71.01                                                         | 71.00     |

## REFERENCES

1. Erickson, K. M. High Temperature D<sub>2</sub>O Isotope Effects on Hydrolysis and Ionization Equilibria in Water. The University of Guelph, Guelph, Ontario, Canada, 2013.
2. Bešter-Rogač, M.; Neueder, R.; Barthel, J.; Apelblat, A., Conductivity studies of aqueous solutions of stereoisomers of tartaric acids and tartrates. Part II D-, L-, and meso-tartaric acids. *J. Solution Chem.* **1997**, *26*, 537-550.
3. Tsurko, E. N.; Neueder, R.; Barthel, J.; Apelblat, A., Conductivity of phosphoric acid, sodium, potassium, and ammonium phosphates in dilute aqueous solutions from 278.15 K to 308.15 K. *J. Solution Chem.* **1999**, *28*, 973-999.
